# Supplementary material for: Fabrication of Organic Solvent Nanofiltration Membrane through Interfacial Polymerization Using N-Phenylthioure as Monomer for Dimethyl Sulfoxide Recovery
Source: MDPI journal article supplement (doi:10.3390/separations10030179), 2023-03-07
Supplement: s1 [file s1]

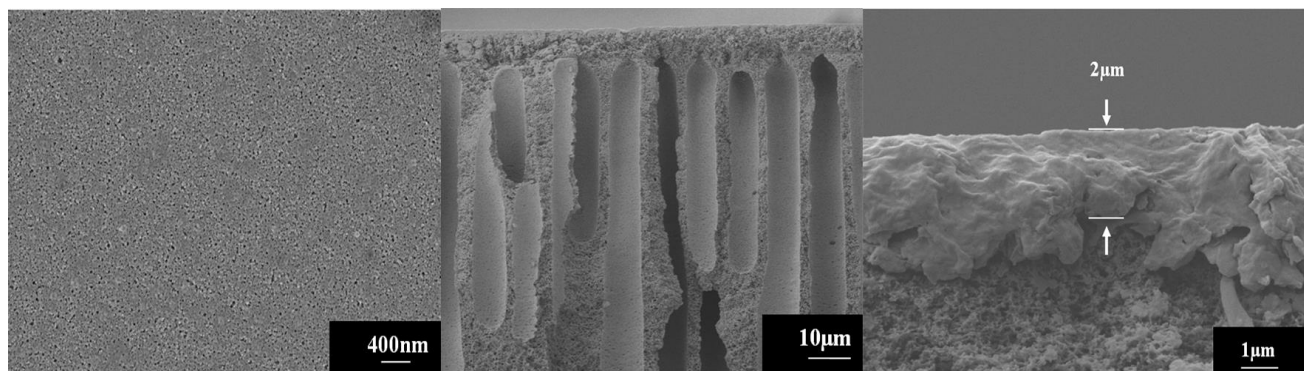

**Figure S1.** SEM images of surface and cross section including NF-J.

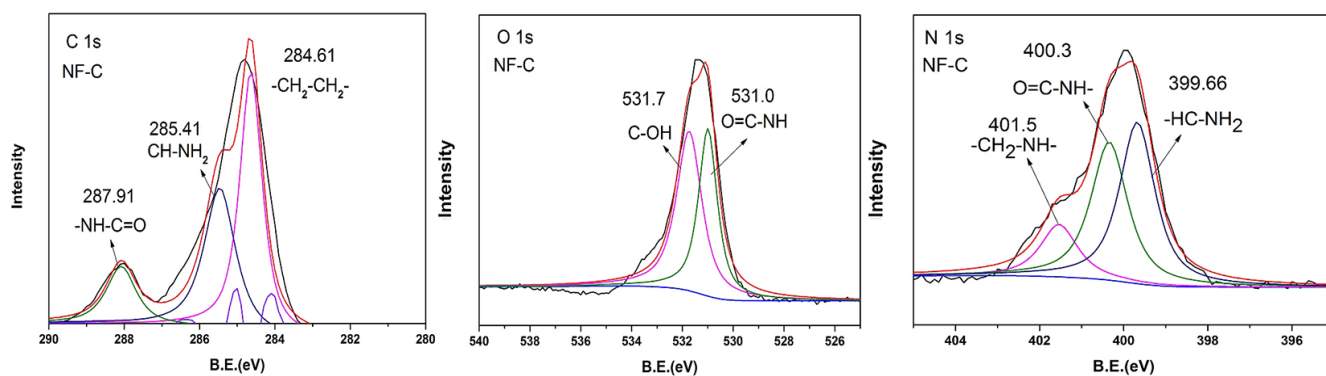

**Figure S2.** C1s, N1s, O1s and S1s XPS spectra of NF-C membranes

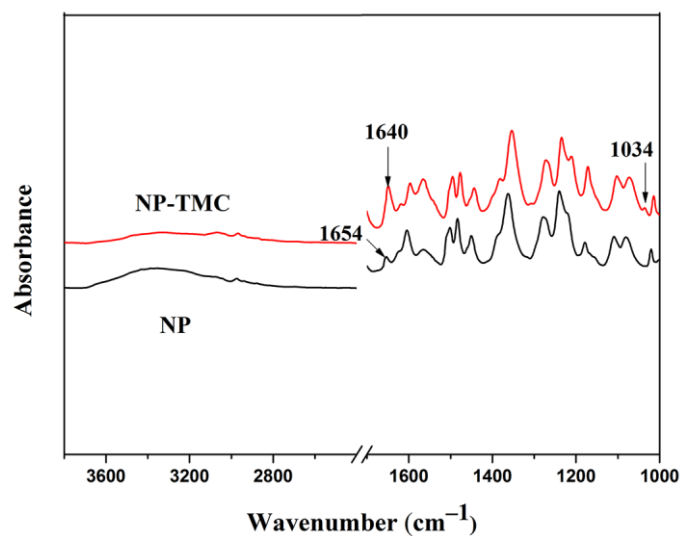

**Figure S3.** ATR-FTIR spectra of the NP-TMC and NP membranes.
